# Supplementary material for: Short-Term Effects of Botulinum Toxin-A Injection on the Medial Gastrocnemius Histological Features in Ambulant Children with Cerebral Palsy: A Longitudinal Pilot Study
Source: MDPI journal article supplement (doi:10.3390/toxins16020069), 2024-01-30
Supplement: s1 [file s1]

# Supplementary Materials: Short-Term Effects of Botulinum Toxin-A Injection on the Medial Gastrocnemius Histological Features in Ambulant Children with Cerebral Palsy: A Longitudinal Pilot Study

**Table S1. Individual characteristics of the enrolled children, the BoNT-A dosage (botox®) and details on casting immediately following BoNT-A.** GMFCS: gross motor function classification system, M: Male, F: Female, BoNT-A: botulinum neurotoxin type-A, 3M biopsy: biopsy 3 months after BoNT-A injection, NA: notavailable.

|           | Age<br>(years) | sex | GMFCS<br>level | involvement | U BoNT-A<br>(botox® per kg<br>body weight) | casting | time    | 3M<br>biopsy |
|-----------|----------------|-----|----------------|-------------|--------------------------------------------|---------|---------|--------------|
| <b>1</b>  | 2.50           | M   | II             | unilateral  | 3                                          | Yes     | NA      | Yes          |
| <b>2</b>  | 2.80           | F   | II             | bilateral   | 2                                          | Yes     | 7 days  | No           |
| <b>3</b>  | 2.82           | M   | I              | unilateral  | 3                                          | Yes     | 14 days | Yes          |
| <b>4</b>  | 3.21           | F   | I              | bilateral   | 3                                          | Yes     | 10 days | Yes          |
| <b>5</b>  | 3.25           | F   | II             | bilateral   | 3                                          | Yes     | 14 days | Yes          |
| <b>6</b>  | 3.30           | M   | III            | bilateral   | 1                                          | Yes     | 10 days | No           |
| <b>7</b>  | 3.38           | M   | I              | unilateral  | 3                                          | no      | --      | Yes          |
| <b>8</b>  | 4.53           | M   | I              | unilateral  | 1                                          | Yes     | 14 days | yes          |
| <b>9</b>  | 4.98           | F   | III            | bilateral   | 2                                          | Yes     | 14 days | Yes          |
| <b>10</b> | 5.12           | M   | III            | bilateral   | 2                                          | Yes     | 14 days | No           |
| <b>11</b> | 5.60           | F   | I              | bilateral   | 3                                          | Yes     | 17 days | Yes          |
| <b>12</b> | 7.82           | M   | II             | bilateral   | 2                                          | Yes     | 15 days | Yes          |
